# Supplementary material
Source: bioRxiv or medRxiv preprint supplement (https://medrxiv.org/highwire/filestream/89410/field_highwire_adjunct_files/1/2020.07.12.20151696-2.pdf)
Supplement: Supplementary file [file 2020.07.12.20151696-2.pdf]

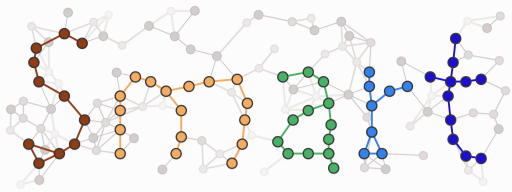

Please write clearly and mark boxes with an 'X'

### About You

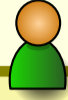

1 What is your school grade?

K  1st  2nd  3rd  4th

Put an X in one box, like this

2 What is your school ID code?

Write one letter or number in each box, like this 1234

3 How old are you?

I am  years old

4 Are you a boy or a girl?

a boy  a girl

### About your family and home

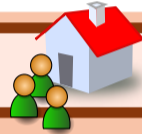

5 Not counting you, how many people live in your home?

people

6 Does any other person sleep in your bedroom?

No  Yes

7 If yes, how many people sleep in your bedroom, not counting you?

people

7 Does anyone in your house go to pre-school or day care?

No  Yes

If yes, how many people go to pre-school or day care?

people

8 You go to elementary school. Does anyone else in your house go to elementary school (grades K to 6)?

No  Yes

If yes, how many people?

people

9 Does anyone in your house go to middle school (grades 7 or 8)?

No  Yes

If yes, how many people?

people

10 Does anyone in your house go to high school (grades 9 to 12)?

No  Yes

If yes, how many people?

people

### About where you go

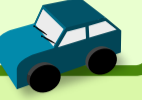

11 Did you go anywhere in the last week that is more than one hour's drive away?

No  Yes

### About feeling sick and staying away from school

Sometimes when we are sick, we don't go to school. These questions are about the last time you were sick and didn't go to school.

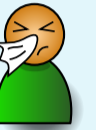

12 When you missed school, did you stay at your home?

No  Yes

13 When you missed school, who took care of you?

No-one

Your Mom or Dad

A brother or sister, or someone else you live with

Someone who doesn't live with you

Don't know

### About YESTERDAY

The rest of this questionnaire asks about your day YESTERDAY. If you can't remember what you did yesterday, ask your teacher for help.

14 Did you attend school YESTERDAY?

No  Yes

15 If you missed school, why was this?

I was sick or ill

School was closed

Some other reason

16 How did you get to school YESTERDAY?

walked or biked

public bus

by car

some other way

school bus

didn't go to school



**28** Did you meet any more people yesterday that you haven't told us about?

No  Yes

**29** If yes, how many more people did you meet yesterday?

*Write how many in the boxes*

Babies and infants  
(0-4 years old)

Children  
(5-18 years old)

Grown-ups  
(19 or older)

**30** Did you meet more or less people yesterday than normal?

Less   
About the same   
More

**31** How easy did you find this questionnaire?

Very easy

Easy

Hard

Very hard

Don't know

**32** What was hard about it?

*Please write in the box below.*

When you have finished and checked your form:

- tear off and keep **SECTION A** from your contact diary page
- make sure you have put your ID stickers in the boxes on all three pages
- hand all the pages back to your teacher
